# Supplementary material
Source: PubMed Central journal article supplement (PMC4228935)
Supplement: NIHMS617239-supplement-01.pdf [file NIHMS617239-supplement-01.pdf]

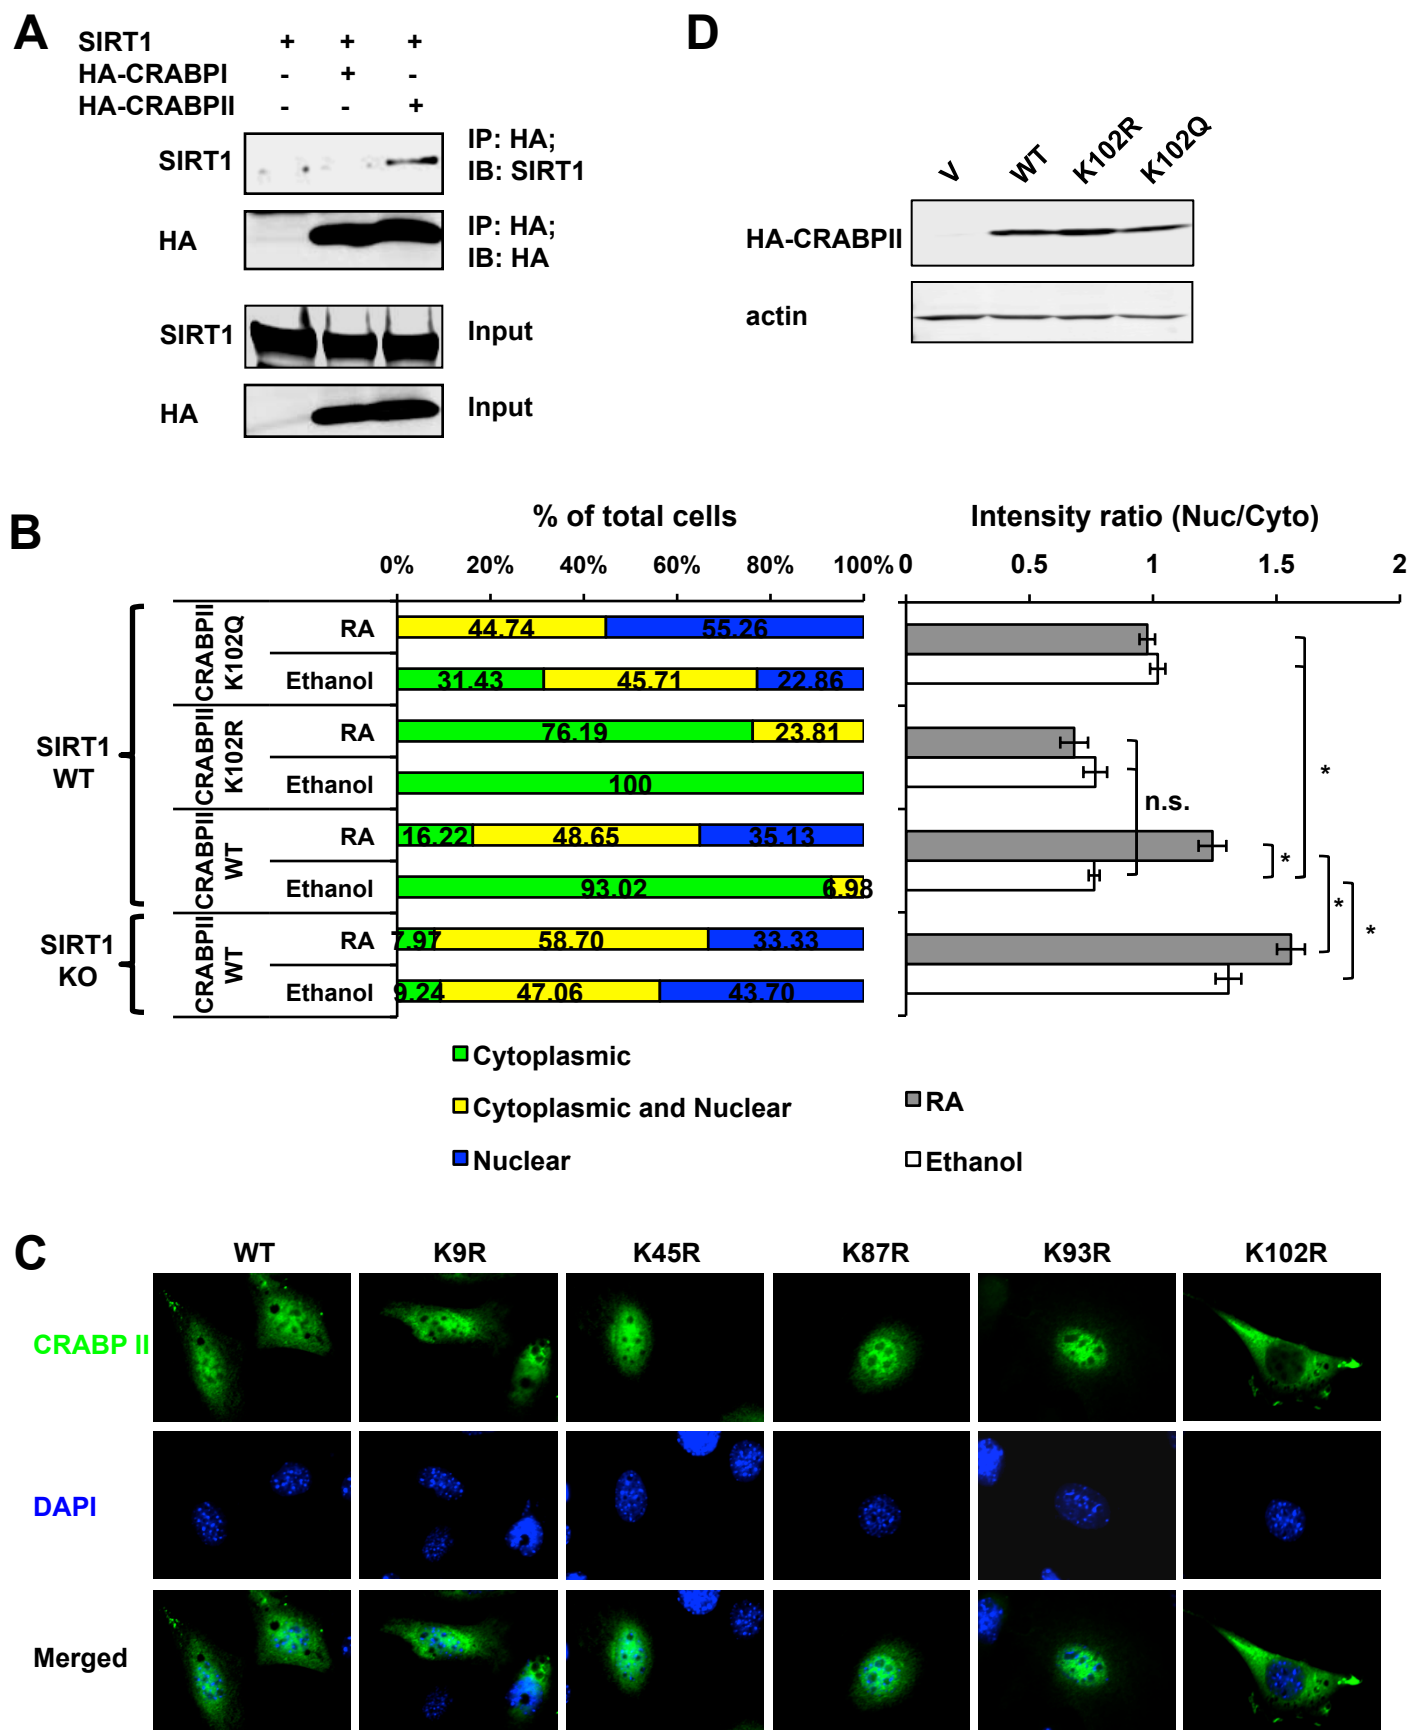

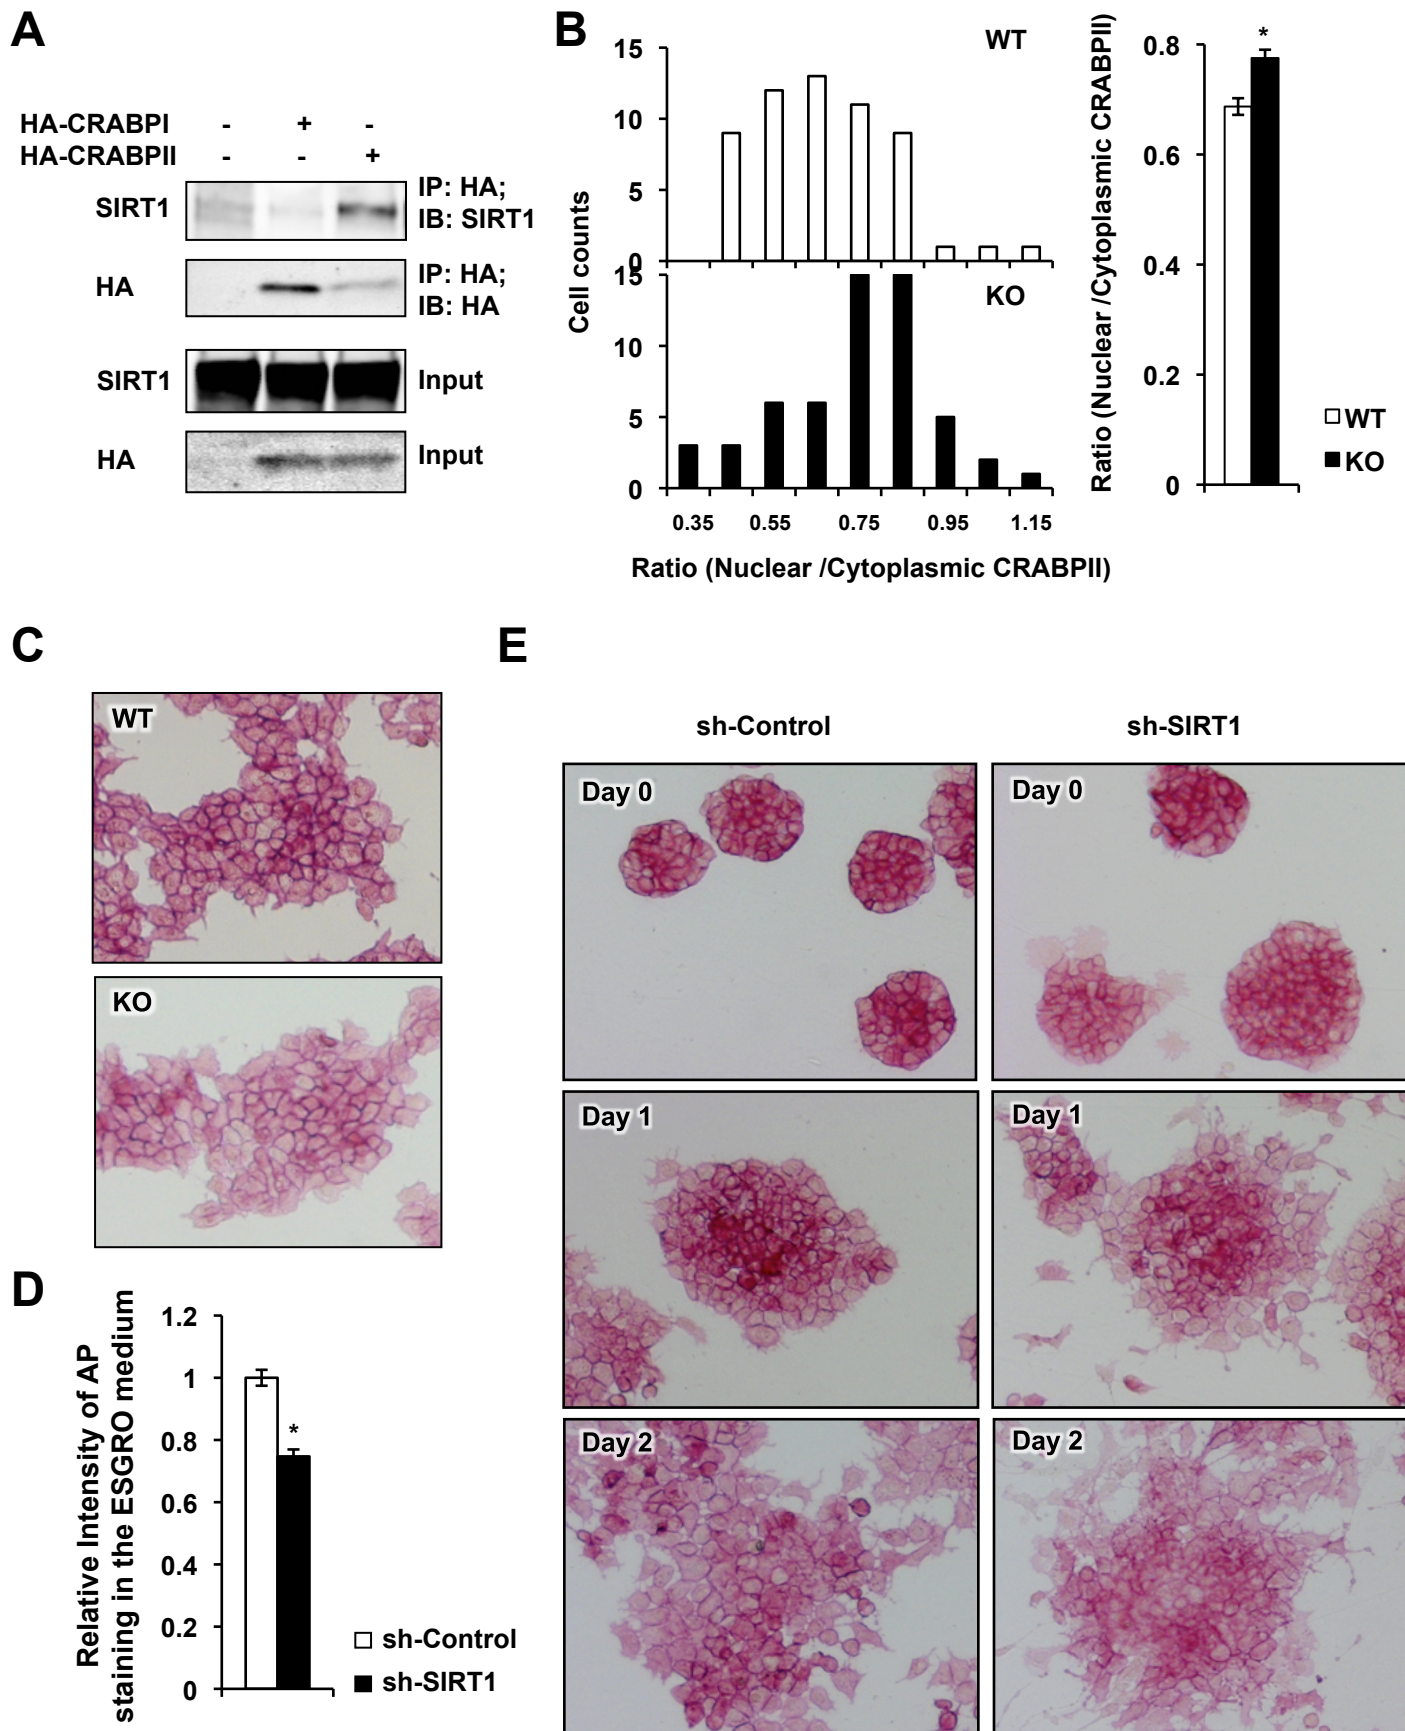

# A Wnt/ $\beta$ -catenin signaling

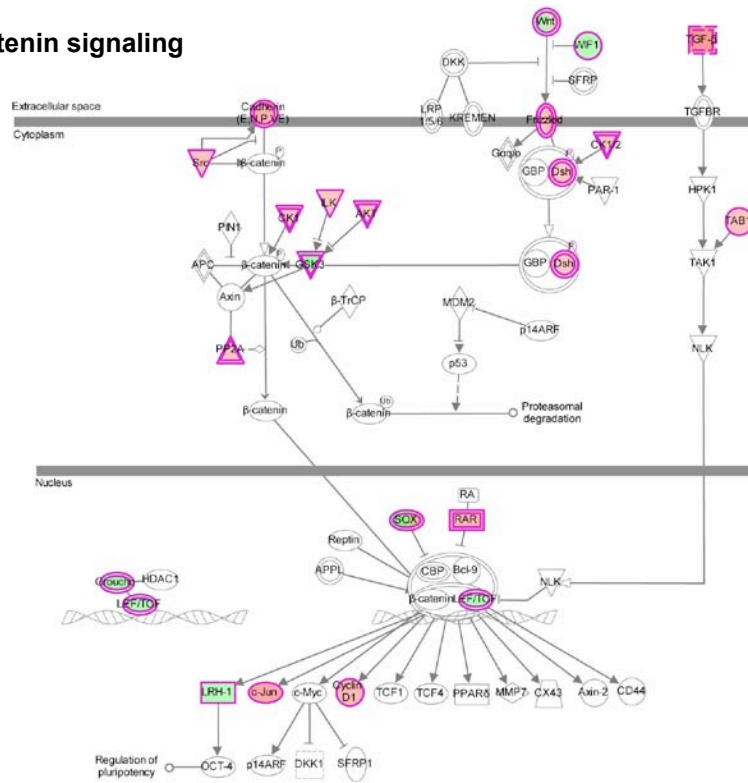

# B Role of Oct4 in Mammalian Embryonic Stem Cell Pluripotency

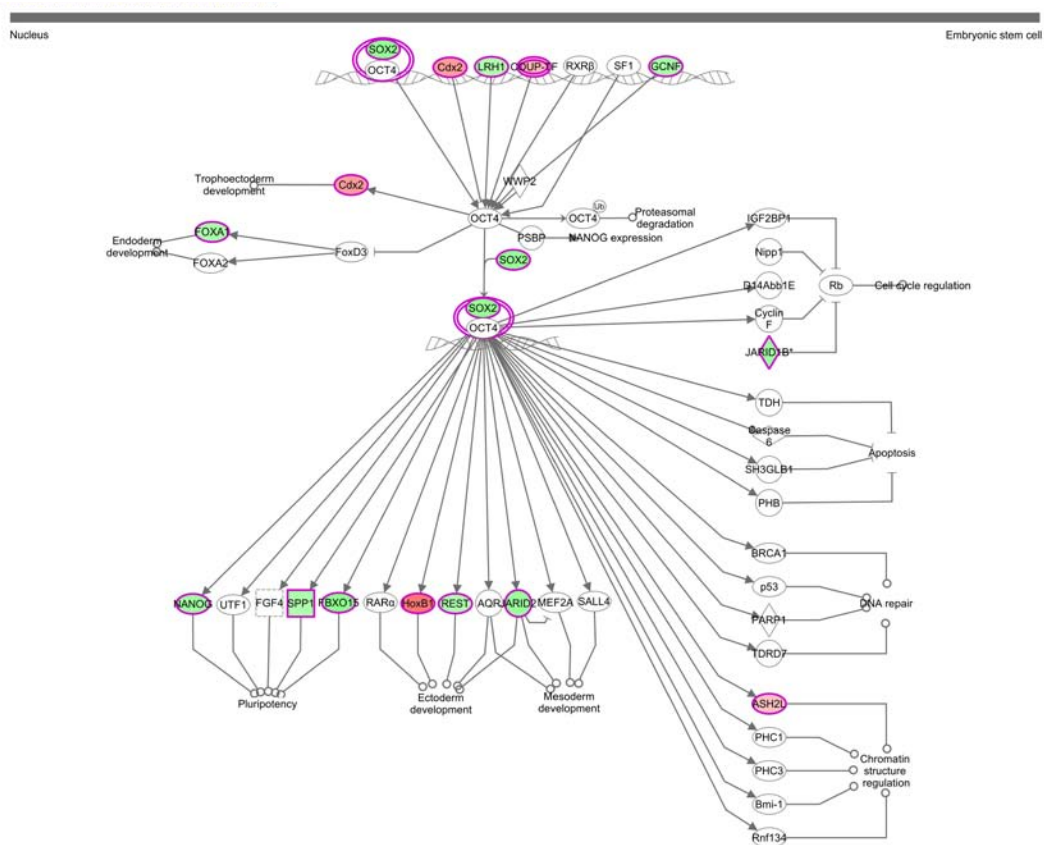

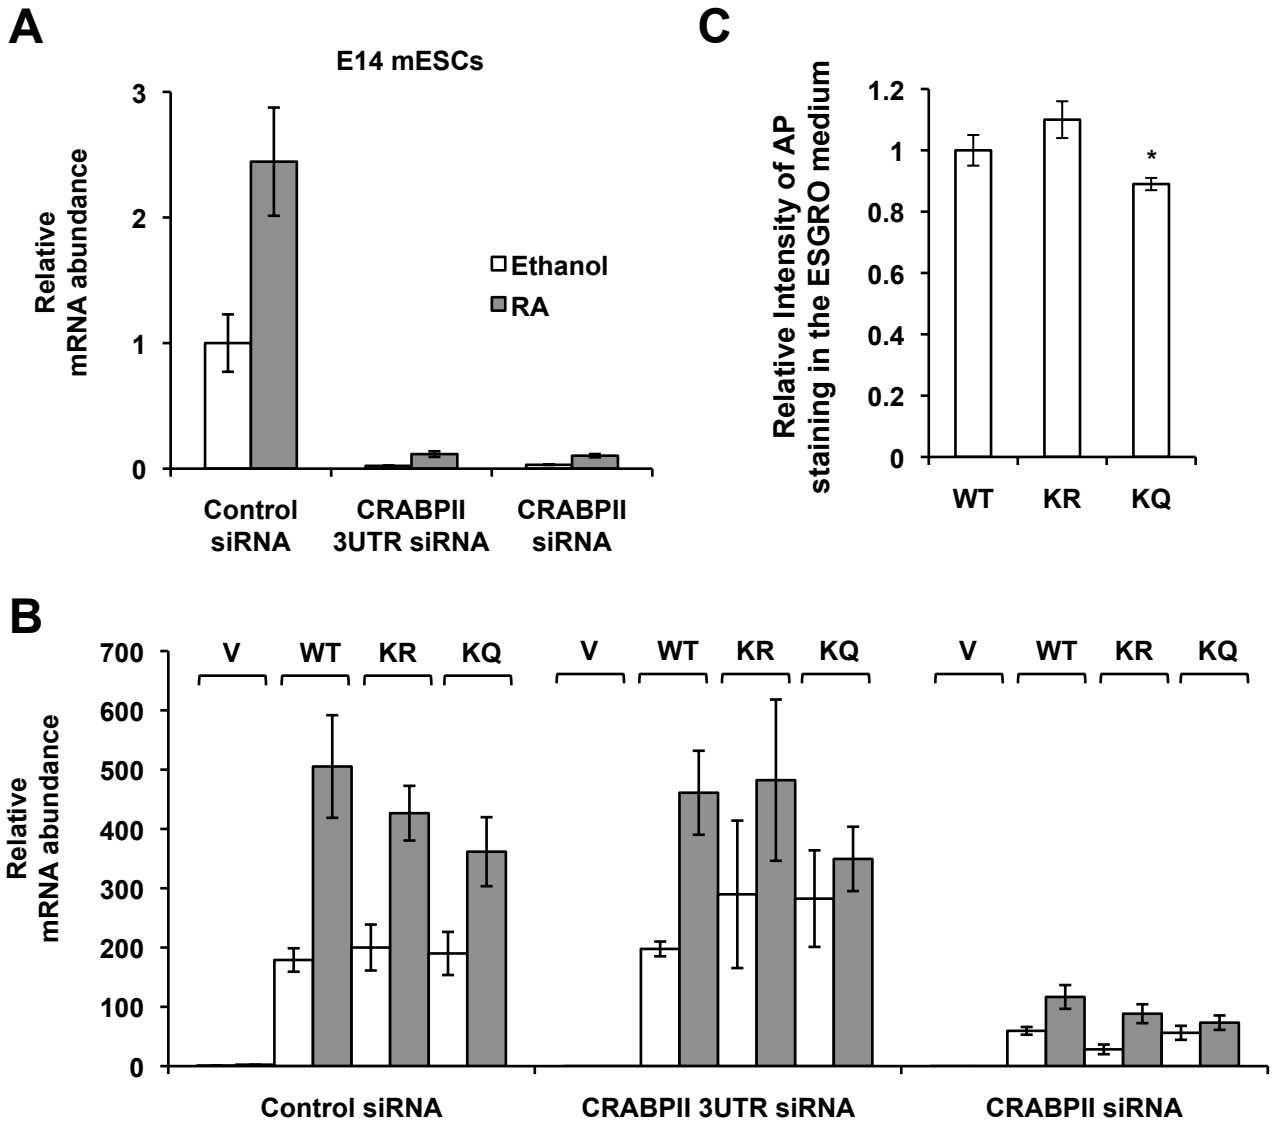



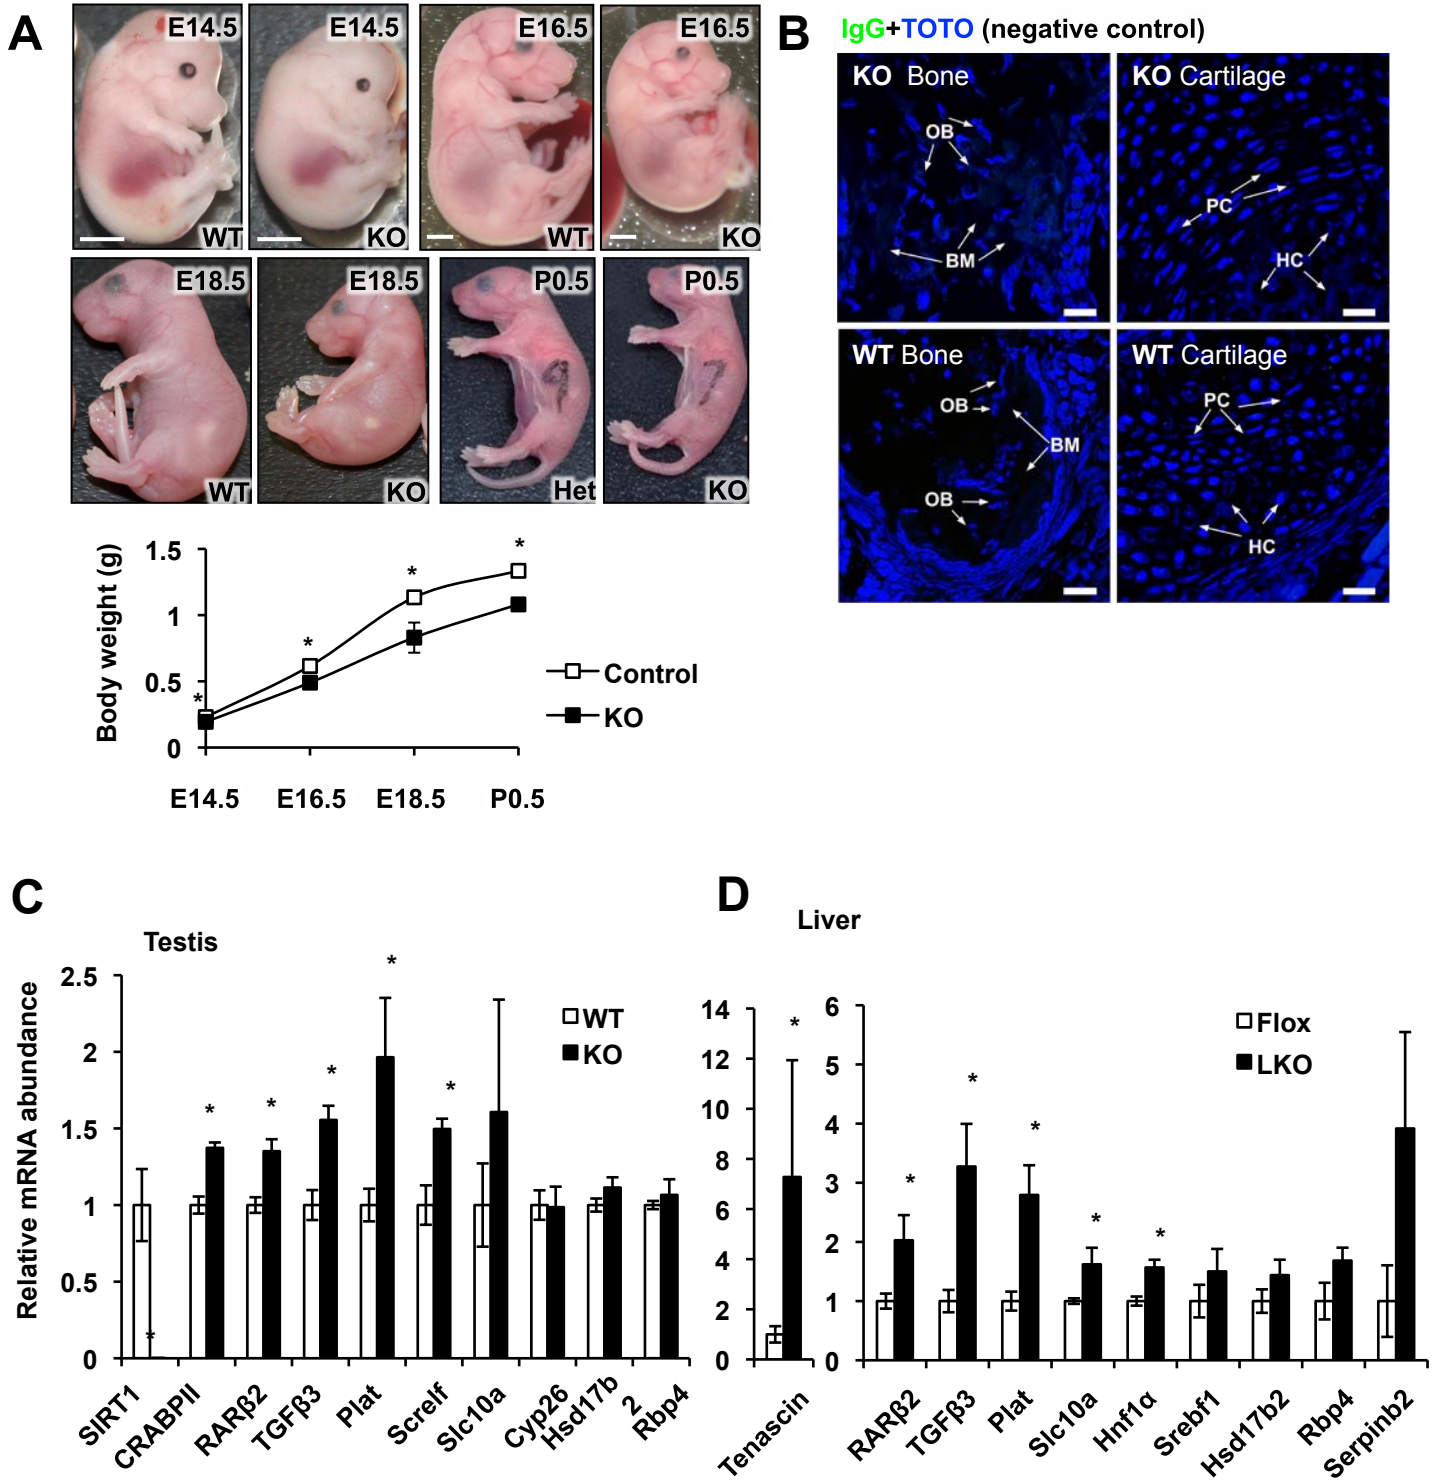

**A**

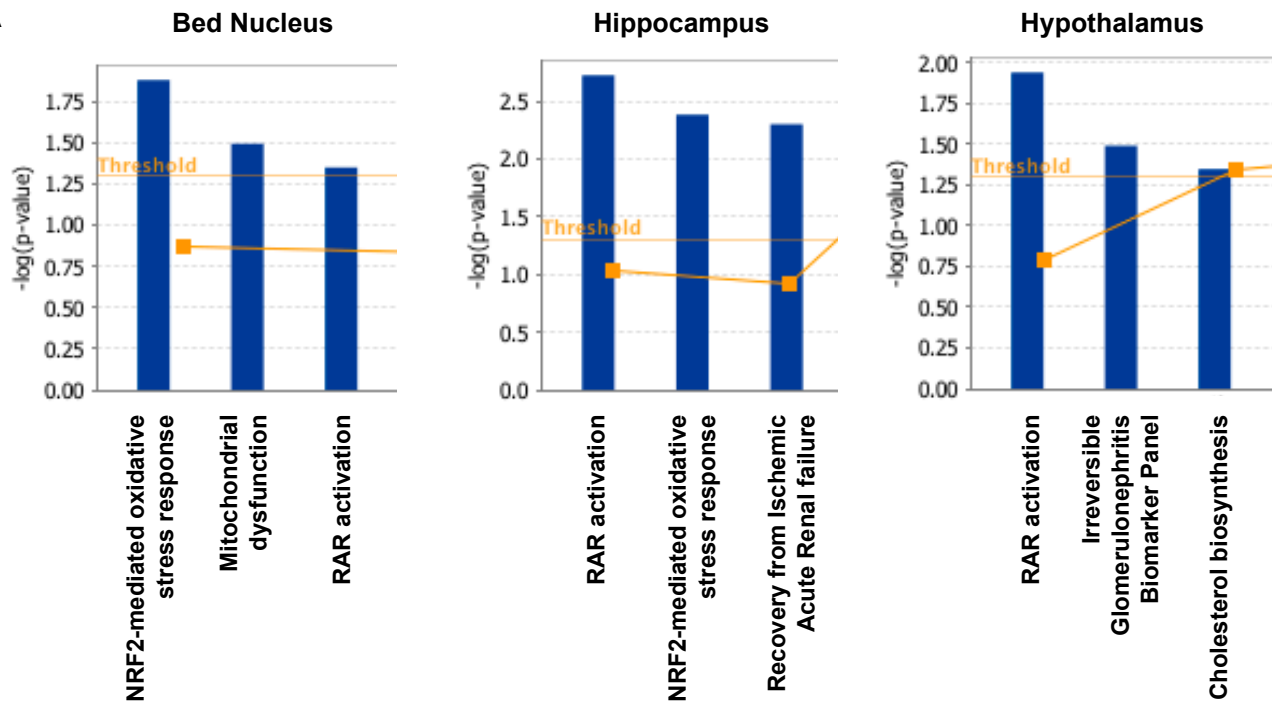

**B**

Distinct RAR activation in the hypothalamus of C57BL/6 vs FVB mice

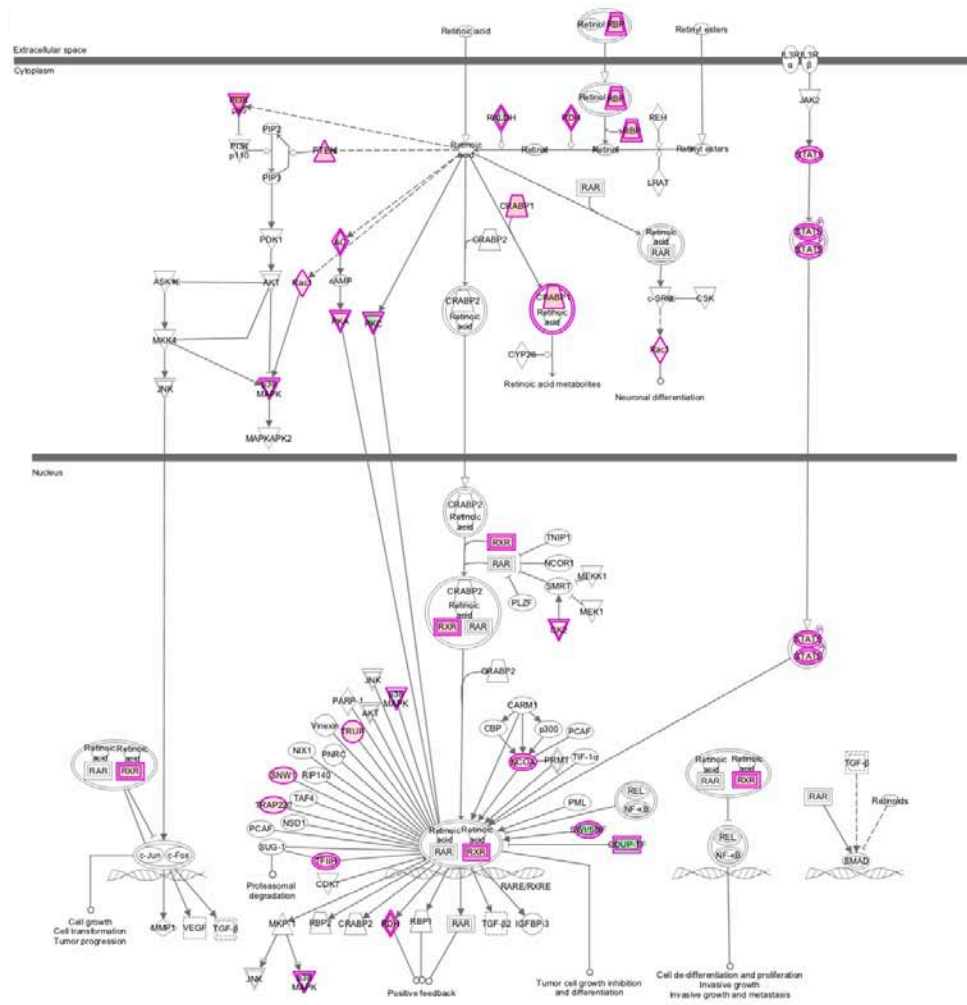

**A**

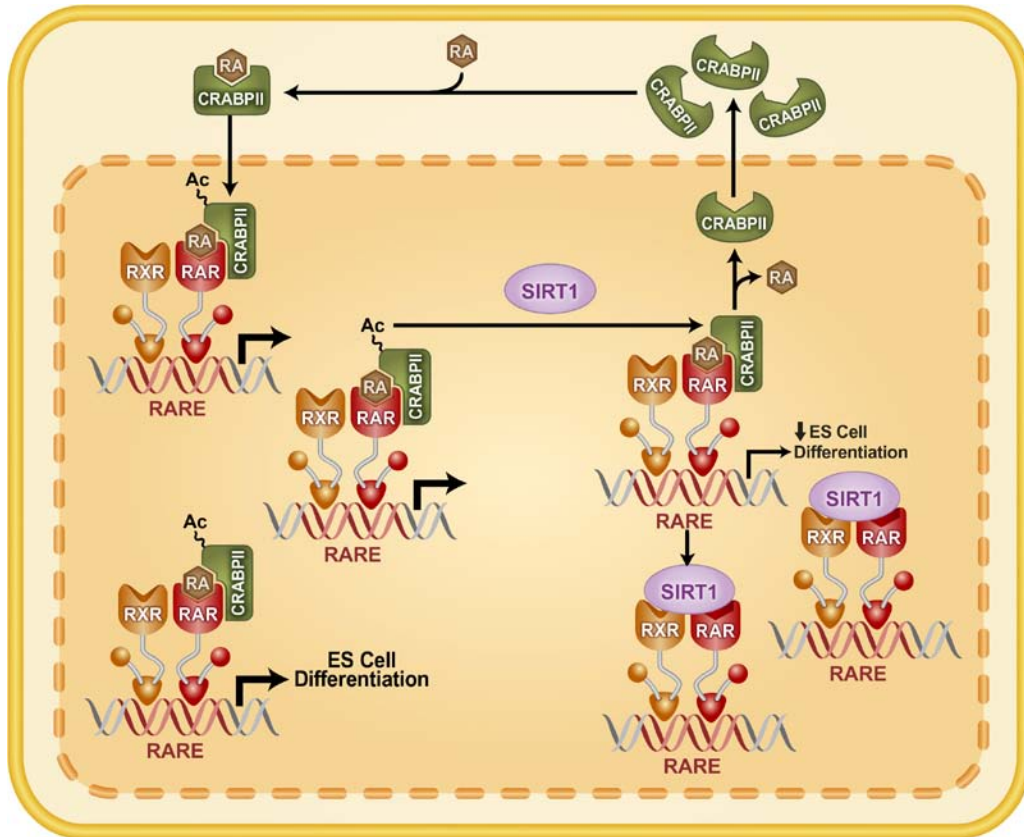

**B**

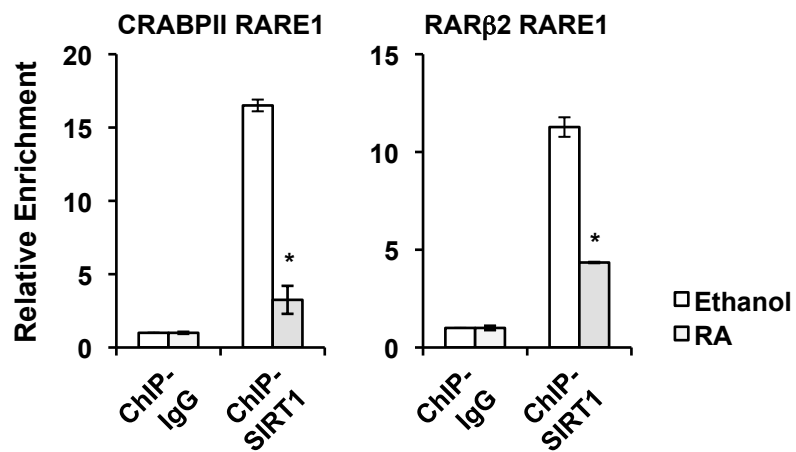

## Supplementary figure legends

**Figure S1.** CRABP II K102 is the key residue that affects its RA-induced nuclear translocation. Related to Figure 1 and Figure 2.

(A) CRABP II, but not CRABP I, interacts with SIRT1 in cells.

(B) Quantification of the subcellular localization of WT and mutant CRABP II proteins in WT and SIRT1 KO MEFs. (Left) The subcellular localizations of WT and mutant CRABP II proteins in WT and SIRT1 KO MEFs were analyzed in 60-100 cells, and percentage of cells with different localization of CRABP II was calculated. (Right) The intensity of nuclear CRABP II and cytoplasmic CRABP II were quantified in at least 20 cells as described in the Experimental procedures, and the ratio of Nuclear/Cytoplasmic CRABP II were calculated. \* $p < 0.05$ , values are represented as mean  $\pm$  SEM.

(C) K to R mutation of K102 site disrupts RA-induced nuclear translocation of CRABP II. MEFs expressing the indicated CRABP II proteins were treated with 0.1  $\mu$ M RA for 6 hours. Cells were then fixed and analyzed for subcellular locations of CRABP II.

(D) The expression levels of WT, K102R, and K102Q proteins in stably MEF lines used for Figure 2D and S2B.

**Figure S2.** SIRT1 deficiency enhances mESC differentiations in response to the RA treatment. Related to Figure 3 and 4.

(A) SIRT1 interacts with CRABP II but not CRABP I in E14 mESCs.

(B) SIRT1 KO mESCs have increased accumulation of CRABP11 in the nucleus. The intensity of nuclear CRABP11 and cytoplasmic CRABP11 were quantified in about 60 cells as described in the Experimental procedures, and the ratio of Nuclear/Cytoplasmic CRABP11 were calculated. Histograms were made with SigmaPlot software. \*  $p < 0.05$ .

(C) WT and KO mESCs in the ESGRO medium were stained for the AP activities.

(D) Knocking-down SIRT1 induces differentiation of mES cells in the ESGRO medium. Sh-Control and sh-SIRT1 mESCs were stained for the AP activities, and the staining intensity was quantified in 60-100 colonies as described in Methods.

(E) Sh-Control and sh-SIRT1 mESCs were treated with 20 nM of RA in the M10 medium for indicated days.

**Figure S3.** IPA analyses of transcriptomes of sh-Control and sh-SIRT1 mESCs. Related to Figure 5.

(A) The “Wnt/ $\beta$ -catenin signaling pathway” is upregulated (red) in sh-SIRT1 mESCs.

(B) The “Role of Oct4 in Mammalian Embryonic Stem Cell Pluripotency pathway” is downregulated (green) in sh-SIRT1 mESCs. 1,468 significantly changed gene probes in RA treated sh-SIRT1 and sh-Control samples were analyzed by IPA.

**Figure S4.** CRABP2 expression levels in mESCs transfected with control or CRABP2 siRNAs. Related to Figure 6.

(A) Both CRABP2 3'UTR siRNA (siRNA targets 3'UTR of CRABP2 gene) and CRABP2 siRNA (siRNA targets the protein coding region of CRABP2 gene) can efficiently knock down the mRNA levels of endogenous CRABP2.

(B) CRABP2 3' UTR siRNA fails to knock down the mRNA levels of overexpressed WT and mutant CRABP2s.

(C) The CRABP2 K102Q mutant has increased ability to induce mESC differentiation morphologically. mESCs stably expressing indicated CRABP2 proteins were cultured in the ESGRO medium. The AP activities were stained and the staining intensity was quantified in 60-100 colonies as described in Methods.

**Figure S5.** Deletion of SIRT1 in mice leads to developmental abnormalities and abnormal RA signaling in newborn mice. Related to Figure 7.

(A) SIRT1 deficiency on the C57BL/6J background leads to developmental abnormalities. SIRT1 KO embryos (E14.5, E16.5, E18.5) and newborns (P0.5) display growth retardation. Bar, 2 mm.

(B) IgG negative control staining in osteoblasts (left panels) and chondrocytes (right panels). Bar, 10  $\mu$ m. Vertebral sections from WT and SIRT1 KO newborn pups (P0.5) were stained with normal IgG.

(C) Adult SIRT1 KO mice in a mixed 129SVJ/CD1 background have enhanced expression levels of a number of RA target genes in testis. n=4, \*p<0.05.



(D) SIRT1 liver-specific KO mice (LKO) have an increased hepatic transcriptional response to the RA treatment compared to control mice. Male Flox and SIRT1 LKO mice were fed with a vitamin A deficient diet for 8 weeks, and then given a dose of 5mg/kg *all-trans* RA via intragastric gavage. Livers were harvested 24 hours later and total mRNA was analyzed by qPCR (n=5, \*p<0.05).

**Figure S6.** Brains from mice on C57BL/6 or FVB background have distinct RA signaling pathways. Related to Figure 7.

(A) Top three differentially expressed canonical pathways in three different regions of mouse brains on the C57BL/6 background compared to the FVB background. Microarray data from GSE3327 dataset were analyzed by IPA.

(B) The “RAR activation pathway” is generally hyper-activated (red) in the hypothalamus of C57BL/6 mice compared to FVB mice. Microarray data from GSE3327 dataset were analyzed by IPA.

**Figure S7.** SIRT1-mediated deacetylation of CRABP II modulates RA-induced ES cell differentiation. Related to Figure 1 to Figure 6.

(A) A working model for the action of SIRT1/CRABP II in cellular RA signaling and ES cell differentiation. Our data indicate that the acetylation status of K102 of CRABP II protein directly influences its subcellular localization. Acetylation of K102 promotes nuclear accumulation of CRABP II, enhancing its ability to co-activate RAR and promoting ES cell differentiation. SIRT1 deacetylates

CRABPII, promoting its recycling to the cytosol and subsequent inactivation of RAR, and thereby inhibiting ES cell differentiation.

(B) SIRT1 is depleted from RARE upon RA treatment. WT MEFs were treated with or without 0.1  $\mu$ M RA for 3 hours. Cells were then crosslinked with 1% paraformaldehyde and sonicated. Chromatin-IP were performed with anti-SIRT1 antibody (ChIP-SIRT1) or negative control IgG (ChIP-IgG). The the associated DNA fragments were analyzed by quantitative qPCR using primers flanking indicated RAREs.

**Table S1.** Both CRABPI and CRABPII are hyperacetylated in SIRT1 KO MEFs. Related to Figure 1.

The acetylation levels of all proteins in WT and SIRT1 KO MEFs were analyzed by a SILAC-based lys-acetylomic method as described in Chen et al (Ref. 28 in the main text).

**Table S2.** Significantly changed gene probes in RA-treated sh-SIRT1 vs sh-Control mESCs. Related to Figure 5.

Cut off: 1.5 folds, adjust p value <0.05.

**Table S3.** Top 20 Canonical Pathways enriched in RA treated sh-SIRT1 vs sh-Control mESCs. Related to Figure 5.

Significant changed gene list in Table S2 were analyzed by IPA software.

**Table S4.** Neonatal death of SIRT1 KO mice in C57BL/6 background. Related to Figure 7.

Four litters of newborn pups were analyzed for their survival at P0.5.

## **Supplementary Experimental Procedures**

### **Constructs**

HA-tagged mouse CRABPI and CRABPII were cloned into pcDNA 3.0 vector. The constructs expressing substitution deacetylation and acetylation mutants of CRABPII were derived from the pcDNA-HA-CRABPII (WT) construct using a Quick-change site mutagenesis kit (Agilent). Lentiviral constructs expressing WT, K102R, and K102Q HA-CRABPII protein were generated with the pHAGE-puro vector. Control shRNA and SIRT1 shRNA lentiviruses were purchased from the Santa Cruz Biotechnology.

### **Cell culture**

HEK293T cells and MEFs isolated from WT or SIRT1 KO mice were maintained in Dulbecco's modified Eagle's medium (DMEM) containing 10% fetal bovine serum (FBS).

E14 mESC line was from ATCC, and WT and SIRT1 KO mESCs have been described (McBurney et al., 2003). All stem cells were maintained in the ESGRO Complete Clonal Grade Medium (ESGRO medium, Millipore). To induce the differentiation of mESCs with RA, mESCs were first cultured on gelatin-coated plates in the M10 medium (DMEM, 10% ES cell FBS, 2 mM L-glutamine,

1 mM sodium pyruvate, 0.1 mM nonessential amino acids, 10  $\mu$ M 2-mercaptoethanol, and 500 units/ml leukocyte inhibitory factor). sh-Control and sh-SIRT1 mESCs were treated with ethanol or 20 nM RA in the M10 medium for indicated times. WT and SIRT1 KO mESCs were treated with 0.2  $\mu$ M RA.

### **Immuno-fluorescence assays**

Immuno-fluorescence (IF) assays in MEFs and mouse tissues were performed as described (Grant et al., 2013; Guo et al., 2010). Antibodies: RAR $\beta$  (abcam, ab53161); SIRT1 (Cell Signaling, #2028); HA (Santa Cruz biotech, sc-7329). WT and SIRT1 KO MEFs stably expressing HA-CRABP II were treated with ethanol or 0.1  $\mu$ M RA for 6 hours before analysis. Images were taken by a Zeiss LSM 710 confocal microscope and quantified using ImageJ/SigmaPlot software, and confirmed by MetaMorph Offline Version 7.8.6.0 (Sunnyvale). Briefly, for image analysis of nuclear/cytoplasmic intensity of CRABP II using ImageJ/SigmaPlot, the intensity of CRABP II and DAPI along the maximum cell diameter from at least 20 random selected cells per sample was profiled with ImageJ. The nuclear and cytoplasmic CRABP II intensities were then separated by DAPI defined boundary and quantified in SigmaPlot. For image analysis of nuclear/cytoplasmic intensity of CRABP II using MetaMorph, the blue channel (DAPI staining) was used to create a binary mask which identified the nucleus for other channels. This nuclear mask was then inverted to create a mask for the cytoplasm. The nuclear mask was then applied to the green channel to obtain a measurement of the staining intensity in the nucleus. Subsequently, the

cytoplasm mask was then applied to the green channel and an inclusive threshold of 25-255 applied to obtain the intensity of the cytoplasm.

### **Immunoprecipitation assay**

To investigate the interaction between SIRT1 and HA-CRABP proteins in HEP293T cells, HEK293T cells transfected with indicated expressing constructs were treated with ethanol or 0.02  $\mu$ M RA for 24 hours, cells were then lysed in the NP40 buffer (50mM Tris-HCL, pH 8.0, 150mM NaCl, 0.5 % NP40) containing Complete TM protease inhibitors (Roche). The whole-cell extracts were immunoprecipitated with monoclonal anti-HA antibody-conjugated agarose beads (Santa Cruz biotech) at 4°C for 2 hours. Immuno-complexes were eluted with the SDS sample buffer and resolved by SDS-PAGE.

To analyze the interaction between endogenous SIRT1 and HA-CRABP II, WT and SIRT1 KO MEFs stably expressing HA-CRABP II were treated with ethanol or 0.1  $\mu$ M RA for 6 hours. Cell extracts were then immunoprecipitated by anti-HA Agarose beads, and then immunoblotted using antibodies against SIRT1 (Sigma).

### **Chromatin immunoprecipitation (ChIP) analysis**

Chromatin immunoprecipitation (ChIP) analysis was performed essentially as described by the manufacturer (Millipore) with some modifications. Briefly, WT and SIRT1 KO MEFs were treated with or without 0.1 mM RA for 3 hours. Cells were crosslinked with 1% paraformaldehyde and sonicated. Chromatin-IP were

performed with anti-HA antibody (ChIP-CRABP II, Santa Cruz biotech, #sc-805), anti-SIRT1 antibody (ChIP-SIRT1, Cell Signaling #2028) or negative control IgG (ChIP-IgG). The associated DNA fragments were analyzed by quantitative qPCR using primers flanking indicated RAREs. Primer sequences: CRABP II RARE1-F: CCTGTCCTCAGCTCAGTTCC; CRABP II RARE1-R: TCTCATCTAGGTGGCCAAGG; RAR $\beta$ 2 RARE1-F: GGGAGTTTTTAAGCGCTGTG; RAR $\beta$ 2 RARE1-R: AACTTTCGGTGAACCCTTCC.

### **Protein Acetylation Analysis**

The hyper-acetylation sites of endogenous CRABP I and CRABP II proteins in SIRT1 KO MEFs were identified with a SILAC-based lys-acetylotomic method (Chen et al., 2012). To analyze the acetylation levels of CRABP II in cells, HEK293T cells transfected with constructs expressing HA-CRABP II or WT or HY mutant of SIRT1, and WT and SIRT1 KO MEFs stably expressing HA-CRABP II, were treated with ethanol or 0.1  $\mu$ M RA for 6 hours. HA-CRABP II was then immunopurified from cell extracts and the acetylation levels were analyzed with anti-acetyl-lysine polyclonal antibodies (Chemicon). To test whether SIRT1 deacetylates CRABP II *in vitro*, acetylated HA-CRABP II protein was immunopurified with anti-HA antibodies from TSA treated SIRT1 KO MEFs, then incubated with 2 units of purified recombinant human SIRT1 protein with or without 200  $\mu$ M NAD<sup>+</sup> or 5 mM Nicotinamide as indicated in the deacetylation



buffer (50 mM Tris-HCl, pH 8.0, 137 mM NaCl, 2.7 mM KCl, 1 mM MgCl<sub>2</sub>, 1 mg/ml BSA, and 200 nM TSA) for 1 hour at 37 °C.
